# Supplementary material for: A novel base editor SpRY-ABE8eF148A mediates efficient A-to-G base editing with a reduced off-target effect
Source: PubMed Central journal article supplement — Mol Ther Nucleic Acids. 2022 Dec 7;31:78–87. doi: 10.1016/j.omtn.2022.12.001 (PMC9804010; doi:10.1016/j.omtn.2022.12.001), 2022-12-07
Supplement: mmc1.pdf [file mmc1.pdf]

**Supplemental information**

**A novel base editor SpRY-ABE8e<sup>F148A</sup> mediates  
efficient A-to-G base editing with a reduced  
off-target effect**

**Guo Li, Yaxian Cheng, Yequi Li, Hongru Ma, Zhongji Pu, Sa Li, Yiqiang Zhao, Xingxu Huang, and Yuan Yao**

## Supplemental Material

**Table S1** Guide sequences used for endogenous gene editing.

**Table S2** Primers used in this study.

**Table S3** The sequences of main plasmids used in this study.

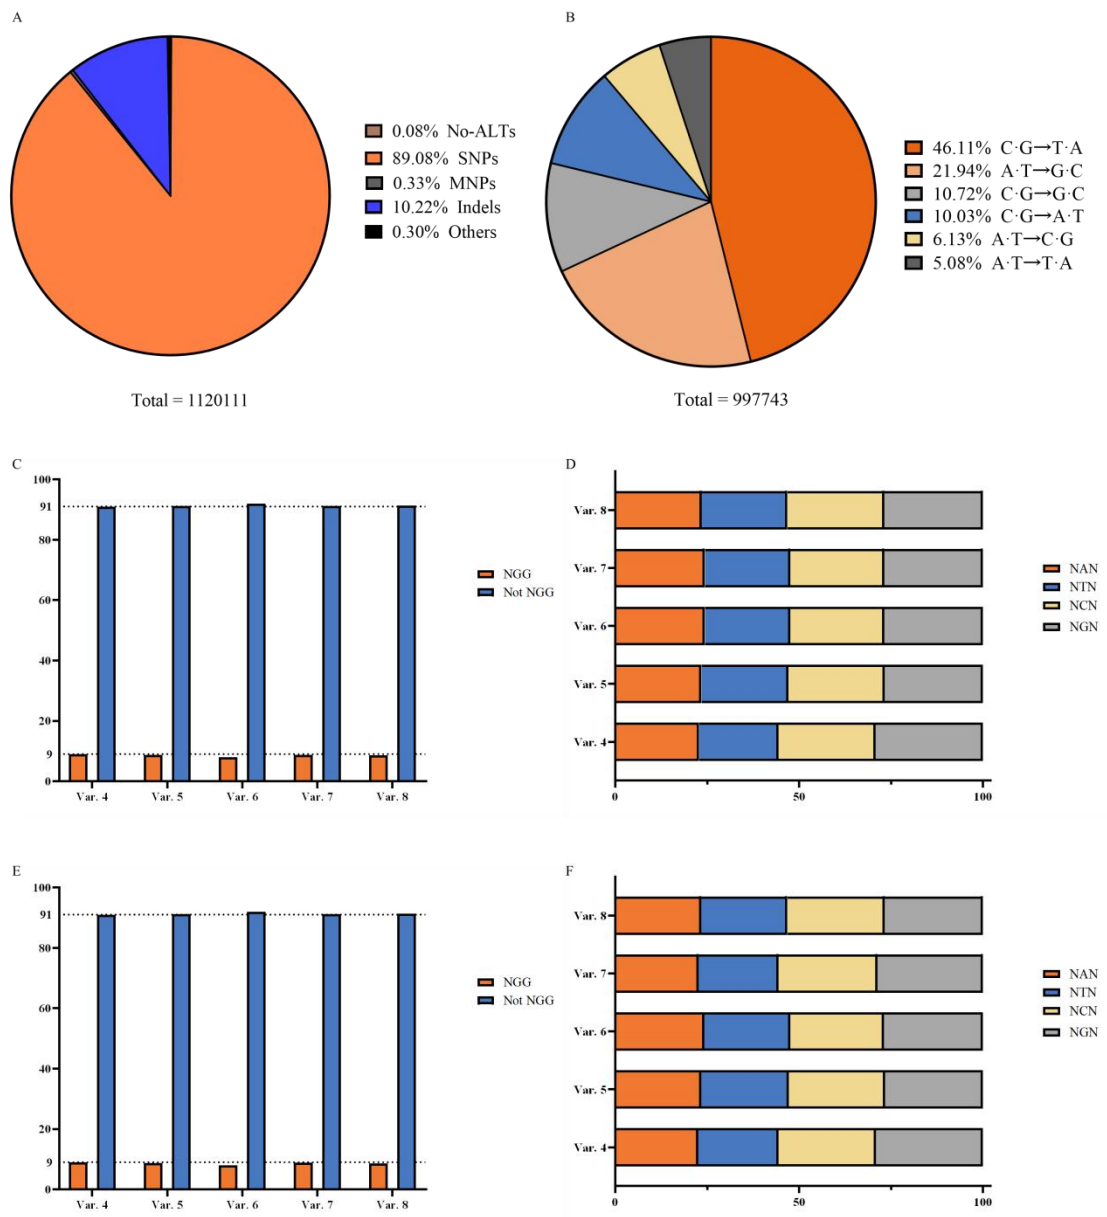

**Fig. S1** The PAM distributions of reverse C•G-to-T•A pathogenic point mutations via ABE-mediated base editing.

A. The classification of human pathogenic genetic variants in the ClinVar database (accessed Feb, 2022). ALTs represent alternate base(s); SNPs (single-nucleotide polymorphisms), represent point mutations; MNPs represent multi-nucleotide polymorphisms.

B. The distributions of mutation required-to-reverse pathogenic point mutation.

B. The distributions of NGG and not NGG PAM by reversion C-to-T pathogenic point mutation by ABE.

C. The distributions of 4 types of PAM by reversion C-to-T pathogenic point mutation by ABE.

D. The distributions of NGG and not NGG PAM by reversion G-to-A pathogenic point mutation by ABE.

E. The distributions of 4 types of PAM by reversion G-to-A pathogenic point mutation by ABE.

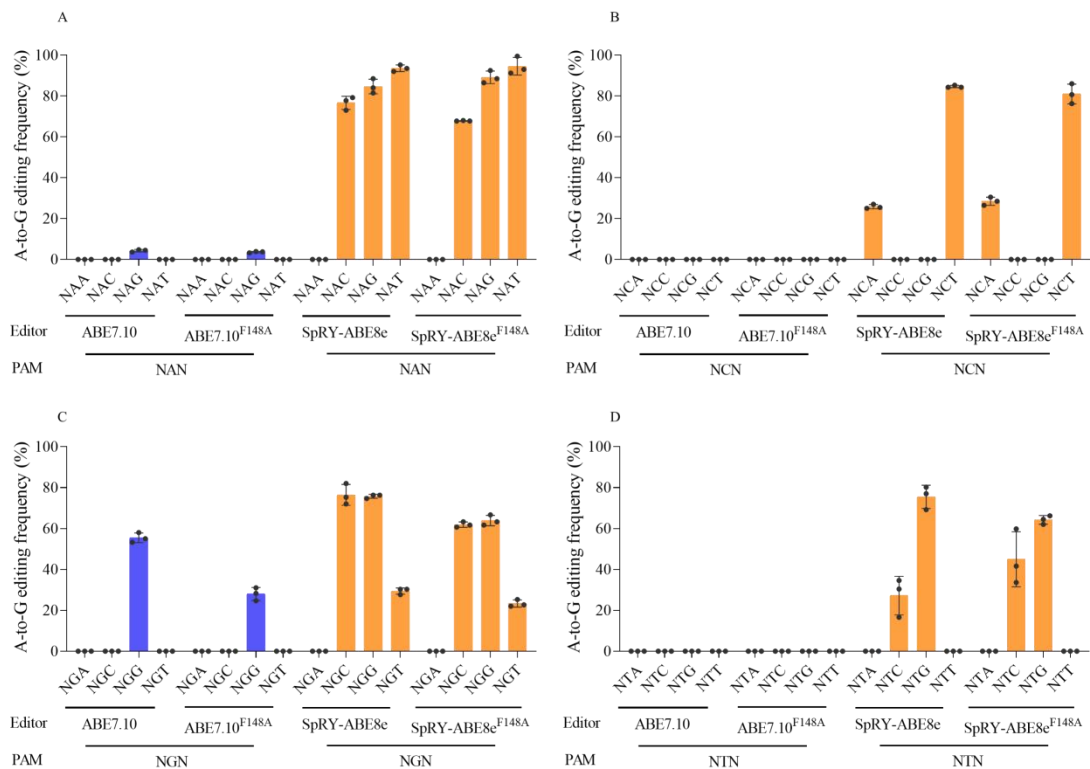

**Fig. S2** Comparison of ABE7.10, ABE7.10<sup>F148A</sup>, SpRY-ABE8e and SpRY-ABE8e<sup>F148A</sup>

base editors' activities across NR/YN PAM sites in VISTA enhancer site hs267.

A. A-to-G base editing of VISTA enhancer site hs267 bearing NAN PAM.

B. A-to-G base editing of VISTA enhancer site hs267 bearing NCN PAM.

C. A-to-G base editing of VISTA enhancer site hs267 bearing NGN PAM.

D. A-to-G base editing of VISTA enhancer site hs267 bearing NTN PAM.

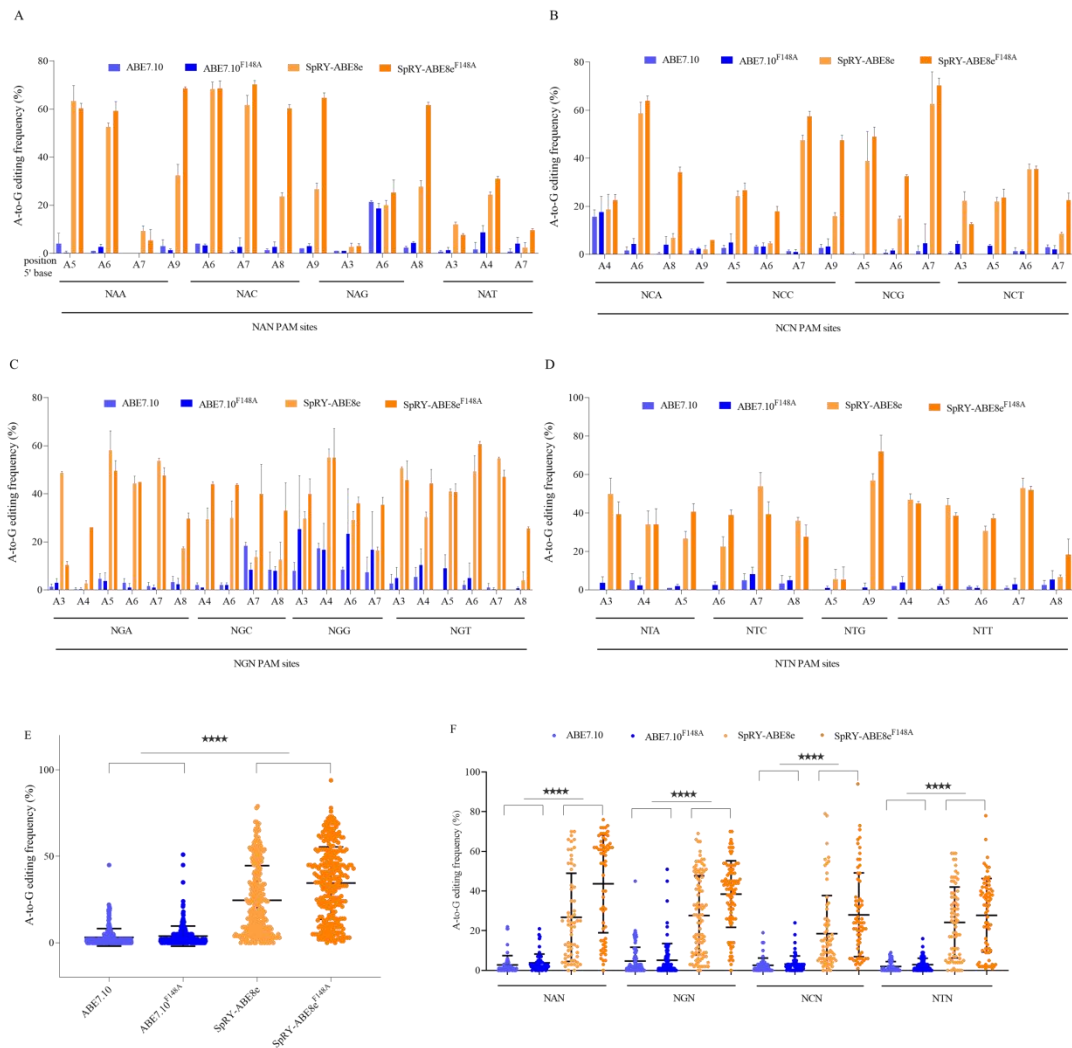

**Fig. S3** Comparison of ABE7.10, ABE7.10<sup>F148A</sup>, SpRY-ABE8e and SpRY-ABE8e<sup>F148A</sup>

base editors' activities across NR/YN PAM sites in HeLa cells.

A. A-to-G base editing of endogenous sites in HeLa cells bearing NAN PAM.

B. A-to-G base editing of endogenous sites in HeLa cells bearing NCN PAM.

C. A-to-G base editing of endogenous sites in HeLa cells bearing NGN PAM.

D. A-to-G base editing of endogenous sites in HeLa cells bearing NTN PAM.

E. Editing efficiencies across target sites with NR/YN PAMs in HeLa cells.

F. Editing efficiencies across target sites with NAN, NGN, NCN, and NTN in HeLa cells, respectively.

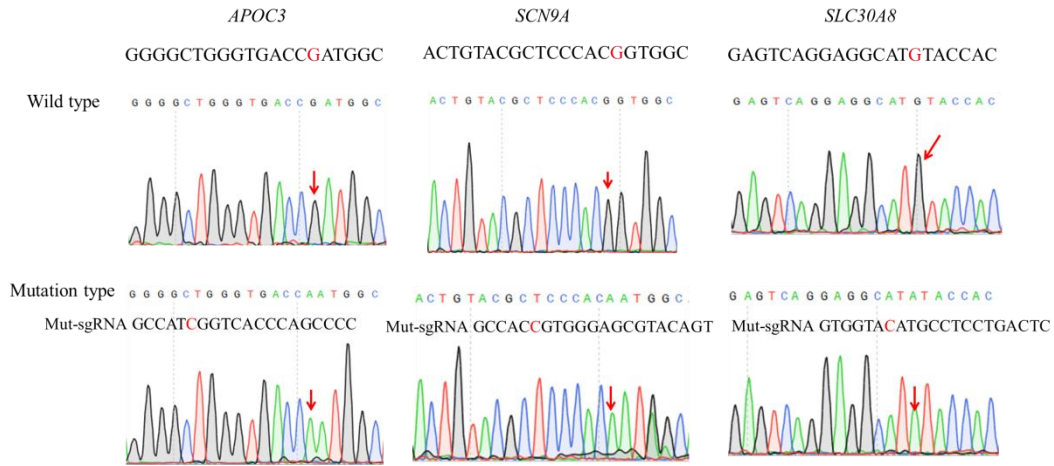

**Fig. S4** Sequence chromatograms of installing *APOC3*, *SCN9A* and *SLC30A8* mutations in HEK293T cells.
